# Supplementary material for: Spatial integration of sensory input and motor output in Pseudomonas aeruginosa chemotaxis through colocalized distribution
Source: eLife journal article supplement (doi:10.7554/elife.97514), 2024-08-20
Supplement: fig3-data1 [file elife-97514-fig3-data1-v1.zip]

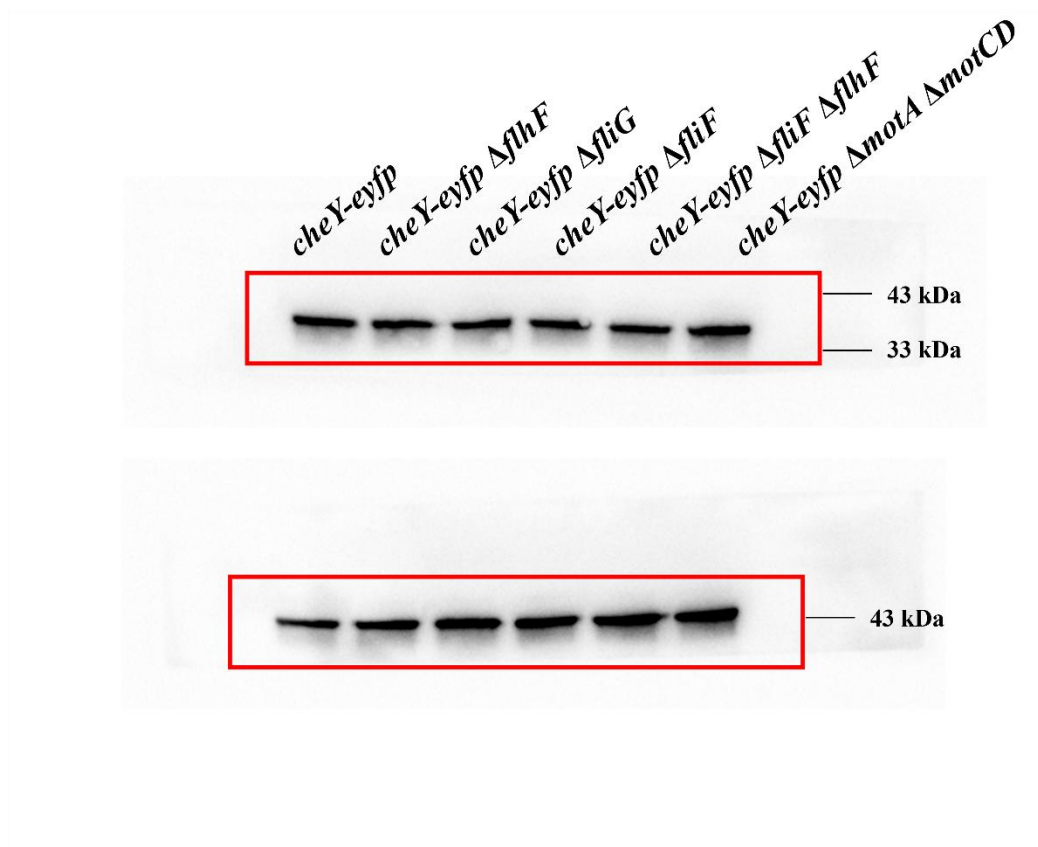

Figure 3B-source data 1. Original membranes (highlighted by red rectangular frames) corresponding to Figure 3B. The upper and lower bands represented the expression levels of protein CheY-eyfp and the housekeeping protein  $\beta$ -actin, respectively, with bands from left to right indicating the corresponding protein expression profiles of six bacterial strains wild-type, mutant  $\Delta flhF$ ,  $\Delta fliG$ ,  $\Delta fliF$ ,  $\Delta fliF \Delta flhF$ , and  $\Delta motA \Delta motCD$ .
