# Supplementary material for: Spatial integration of sensory input and motor output in Pseudomonas aeruginosa chemotaxis through colocalized distribution
Source: eLife journal article supplement (doi:10.7554/elife.97514), 2024-08-20
Supplement: fig4-figsupp1-data1 [file Figure 4-figure supplement 1-source data 1.pdf › Figure 4-supplement 1-Source data 1/Figure 4-figure supplement 1-source data 1.pdf]

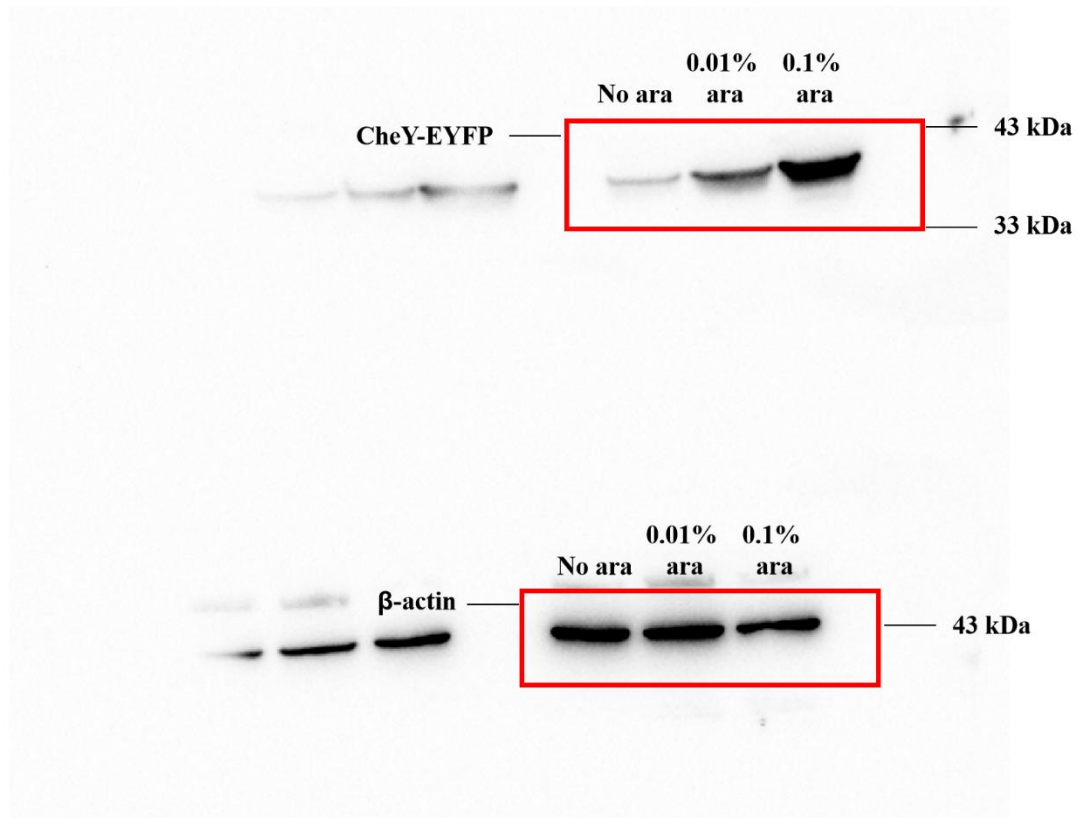

Figure 4-figure supplement 1-source data 1. Original membranes (highlighted by red rectangular frames) corresponding to Figure 4-figure supplement 1. The upper and lower bands represented the expression levels of protein CheY-eyfp and the housekeeping protein  $\beta$ -actin, respectively, with bands from left to right indicating the corresponding protein expression levels induced by different arabinose concentrations 0, 0.01, and 0.1 (% , m/v).
